# Supplementary material for: Large electrocaloric effect under electric field behavior in potassium sodium niobate ceramics with incompletely overlapped phase boundaries
Source: Royal Society of Chemistry journal article supplement (doi:10.1039/d1ta10899a), 2022-01-01
Supplement: d1ta10899a1.pdf [file d1ta10899a1.pdf]

## *Supplementary Information*

### **Large Electrocaloric Effect under Electric Field behavior in Potassium Sodium Niobate Ceramics with Incompletely Overlapped Phase Boundary**

Hong Tao<sup>1,2</sup>, Jie Yin<sup>2</sup>, Chunlin Zhao<sup>3</sup>, Bo Wu<sup>1</sup>, Lin Zhao<sup>1</sup>, Jian Ma<sup>1\*</sup>, and Jiagang Wu<sup>2\*</sup>

<sup>1</sup>Sichuan Prov Key Lab Informat Mat, Southwest Minzu University, Chengdu 610041,  
China

<sup>2</sup>Department of Materials Science, Sichuan University, Chengdu 610064, China

<sup>3</sup>Department of Materials Science, Fuzhou University, Fuzhou, 310002, China

\* Corresponding author:

wujiagang0208@163.com and msewujg@scu.edu.cn (JG Wu)

282508499@qq.com (J Ma)

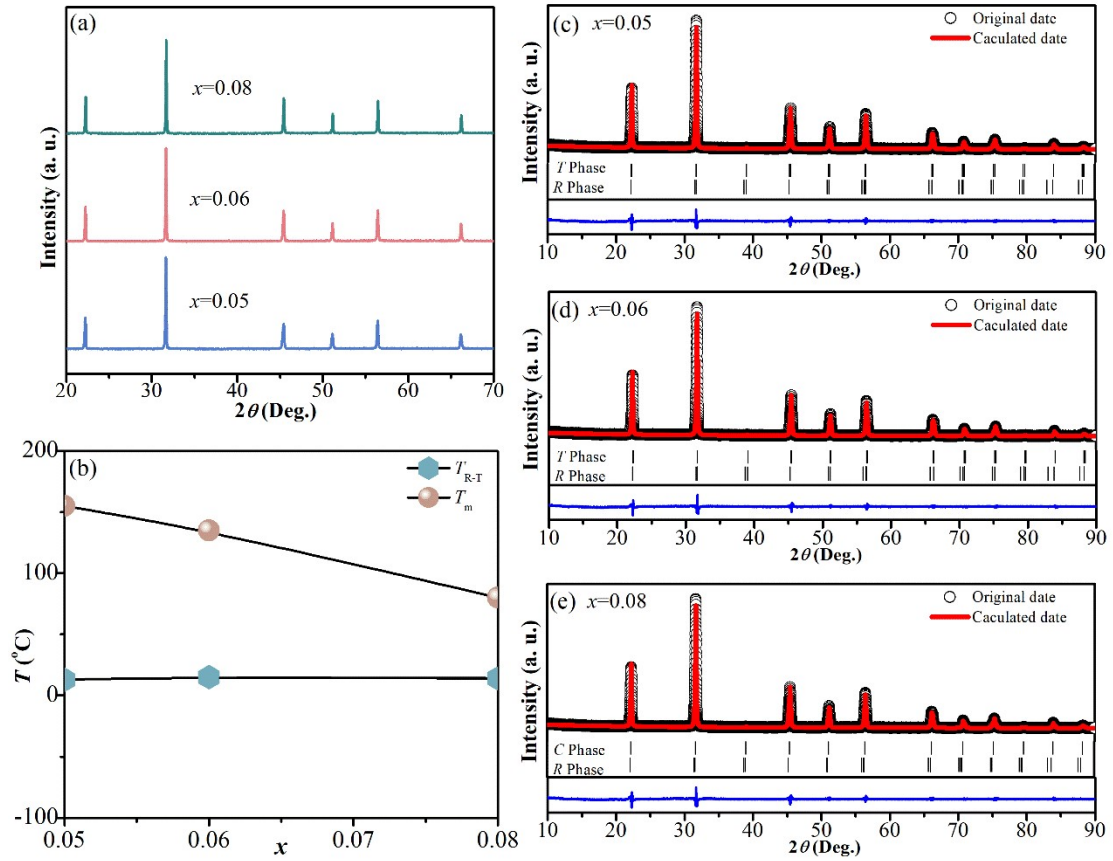

Figure S1. (a) XRD patterns for the ceramics with  $2\theta=20-70^\circ$ , (b) phase diagram of the ceramics, Rietveld refinements of XRD patterns: (c)  $x=0.05$ , (d)  $x=0.06$ , (e)  $x=0.08$ .

Table S1. Parameters of refine result for the KNLNS-BZ-BNH-Fe ceramics with different phase boundary.

| $x$  | Sig  | $R_w$<br>(%) | Space<br>group | $a$ (Å) | $b$ (Å) | $c$ (Å) | Alpha(°) |
|------|------|--------------|----------------|---------|---------|---------|----------|
| 0.05 | 1.89 | 4.7          | R3m.R          | 4.0025  | 4.0025  | 4.0025  | 89.6491  |
|      |      |              | P4mm           | 3.9842  | 3.9842  | 3.9970  | -        |
| 0.06 | 1.82 | 5.1          | R3m.R          | 4.0030  | 4.0030  | 4.0030  | 89.6249  |
|      |      |              | P4mm           | 3.9854  | 3.9854  | 3.9948  | -        |
| 0.08 | 1.85 | 5.39         | R3m.R          | 4.0050  | 4.0050  | 4.0050  | 89.7732  |
|      |      |              | Pm-3m          | 3.9891  | 3.9891  | 3.9891  | -        |

Figure S1(a) shows the XRD patterns of the ceramics measured at room temperature. Typical perovskite structure without impurity phase is found in all the samples. As shown in Fig. S1(b), the  $T_{R-T}$  remain around room temperature with increasing  $x$ , while  $T_m$  gradually decreases. Specially, the phase transition temperature regions broaden for  $x=0.08$ . The  $T_m$  is strongly decreased near room temperature. Therefore, the phase structure can be determined as R-T for  $x=0.05$  and  $0.06$ , and R-C for  $x=0.08$  at room temperature. The phase structures are further verified by well-matched Rietveld refine results, which contain low Sig and Rw values, as shown in Figs. S1(c)~(e) and Table S1. The relative structure parameters of different phases are also presented in Table S1.

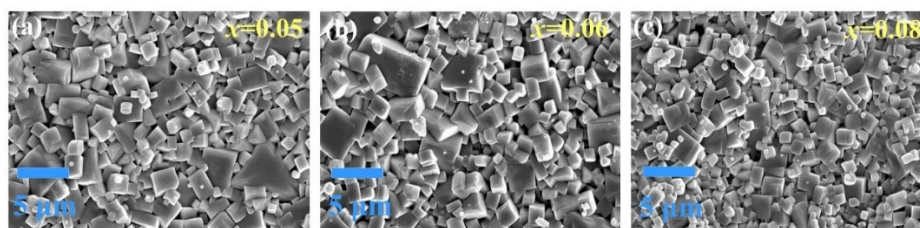

Figure S2. FE-SEM images of the ceramics: (a)  $x=0.05$ , (a)  $x=0.06$  (a)  $x=0.08$ .

Figure S2 shows the FE-SEM images of the ceramics. It can be seen that all the samples are dense along with large and small grains, which is benefit of applying high electric field.

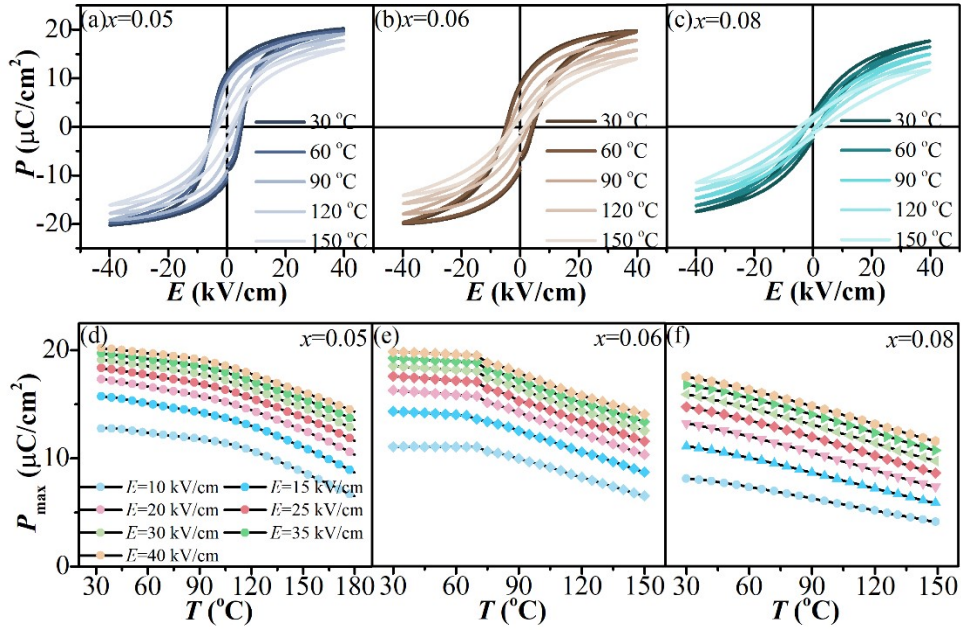

Figure S3.  $P$ - $E$  loops of the ceramics under 40 kV/cm measured at different temperatures: (a)  $x=0.05$ , (b)  $x=0.06$  (c)  $x=0.08$ ,  $P_{\max}$ - $T$  curves: (d)  $x=0.05$ , (e)  $x=0.06$  (f)  $x=0.08$ .

Figure S3 shows the temperature-dependent  $P$ - $E$  loops of the ceramics when  $E=40$  kV/cm. When  $T > 60$  °C, both  $P_{\max}$  and  $P_r$  decreases obviously for  $x=0.05$  and 0.06. When  $x=0.08$ ,  $P_{\max}$  and  $P_r$  decrease with increasing temperature from 30 °C. All the  $P$ - $E$  loops gradually becoming slim at high temperatures. The temperature dependence of  $P_{\max}$  is shown in Figs. S3(d)~(f). Faster decrease of  $P_{\max}$  is obtained around FE-PE phase transition regions with respect FE-FE phase boundary for  $x=0.05$  and 0.06, while continuous decrease is found for  $x=0.08$ .

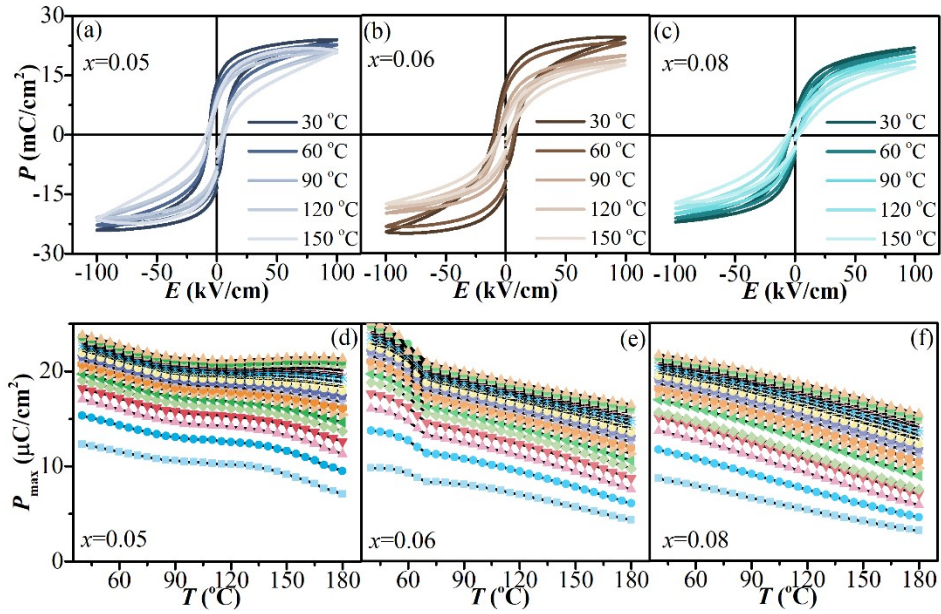

Figure S4.  $P$ - $E$  loops of the ceramics measured at different temperatures under 100 kV/cm: (a)  $x=0.05$ , (b)  $x=0.06$  (c)  $x=0.08$ ,  $P_{\max}$ - $T$  curves: (d)  $x=0.05$ , (e)  $x=0.06$  (f)  $x=0.08$ .

Figures S4(a)~(c) show the  $P$ - $E$  loops at 100 kV/cm and different temperatures. Both  $P_{\max}$  and  $P_r$  gradually decrease with increasing temperatures as well as lowered  $E_C$ , inducing slim  $P$ - $E$  loops. The temperature dependence of  $P_{\max}$  is presented at different  $E$ , as seen in Figs. S4(d) and (f). The decreasing tendency is similar to the phenomenon when  $E=40$  kV/cm.

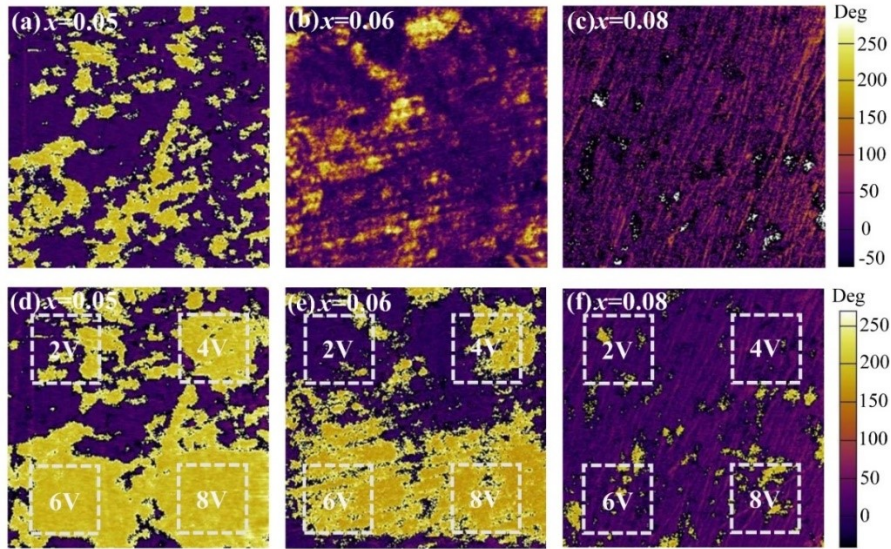

Figure S5. Phase images of virgin domain for the ceramics: (a)  $x=0.05$ , (b)  $x=0.06$  (c)  $x=0.08$ , phase images after poled under 2V~8V: (d)  $x=0.05$ , (e)  $x=0.06$  (f)  $x=0.08$ .

Figures S5(a)~(c) show the phase images of the virgin domain for the ceramics. Domain with both large and small size can be roughly gained for  $x=0.05$  and 0.06, while refined domain occurs for  $x=0.08$ . Then, the phase images after poled under 2-8V, are presented in Figs. S5(d)~(e). Domain switching happens when  $V \geq 4V$  for  $x=0.05$  and 0.06. Moreover, the reversion of switched domain is more for  $x=0.06$  than that for  $x=0.05$ , while the reversion begins from the inside of domain. For  $x=0.08$ , the domain switching is poor because of the strong reversion behavior of the oriented domain after withdrawing V, which originates from the strong random field yielding to excess chemical/structure heterogeneity and PNRs.
